# Supplementary material for: Sterols are required for the coordinated assembly of lipid droplets in developing seeds
Source: PubMed Central journal article supplement (PMC8458542; doi:10.1038/s41467-021-25908-6), 2021-09-22
Supplement: 41467_2021_25908_MOESM1_ESM.pdf [file 41467_2021_25908_MOESM1_ESM.pdf]

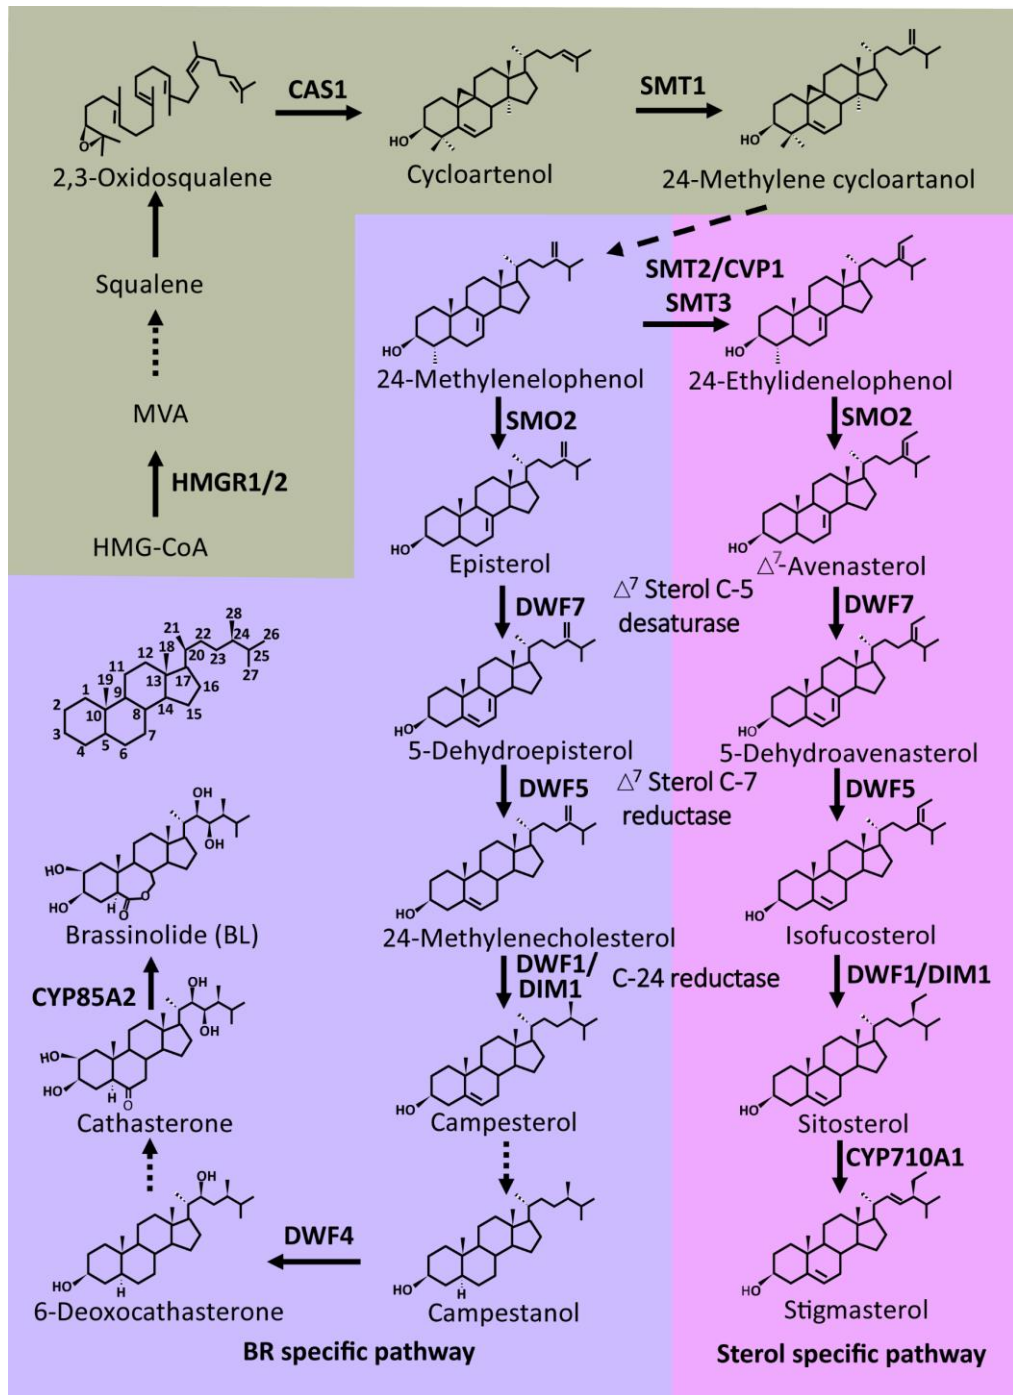

**Supplementary Fig. 1 Schematic diagram of the biosynthetic pathway of plant sterols.** Enzymes are shown in bold. Solid arrows and dashed arrows indicate single-step reactions and several steps, respectively. DWF4 and CYP85A2 are BR specific pathway enzymes. HMG-CoA, 3-hydroxy-3-methylglutaryl-CoA; HMGR, 3-hydroxy-3-methylglutaryl-CoA reductase; MVA, mevalonic acid; CAS1, cycloartenol synthase 1; SMT1, C-24 sterol methyltransferase 1; SMO2, C-4 sterol methyl oxidase 2; SMT2/CVP1, C-24 sterol methyltransferase 2/cotyledon vascular pattern 1; SMT3, C-24 sterol methyltransferase 3; DWF7, dwarf7; DWF5, dwarf5; DWF1/DIM1-1, dwarf1/diminuto1.

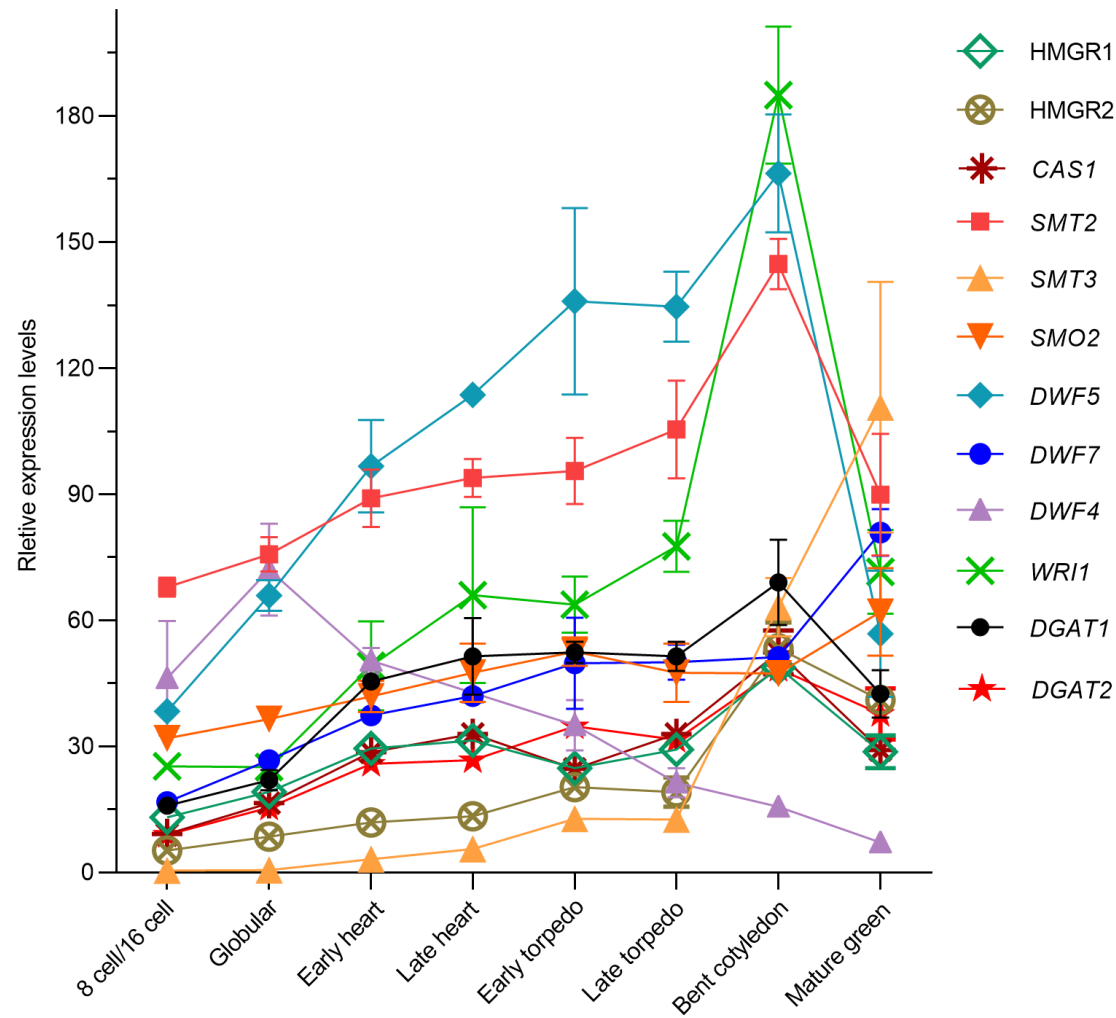

**Supplementary Fig. 2 Expression levels of key sterol and TAG biosynthesis genes in developing embryos.**

Expression data were extracted from the Arabidopsis eFP browser. The data source of eFP browser was set to the Embryo, with absolute values for gene expression. Data are mean  $\pm$  s.d. of three biological replicates.

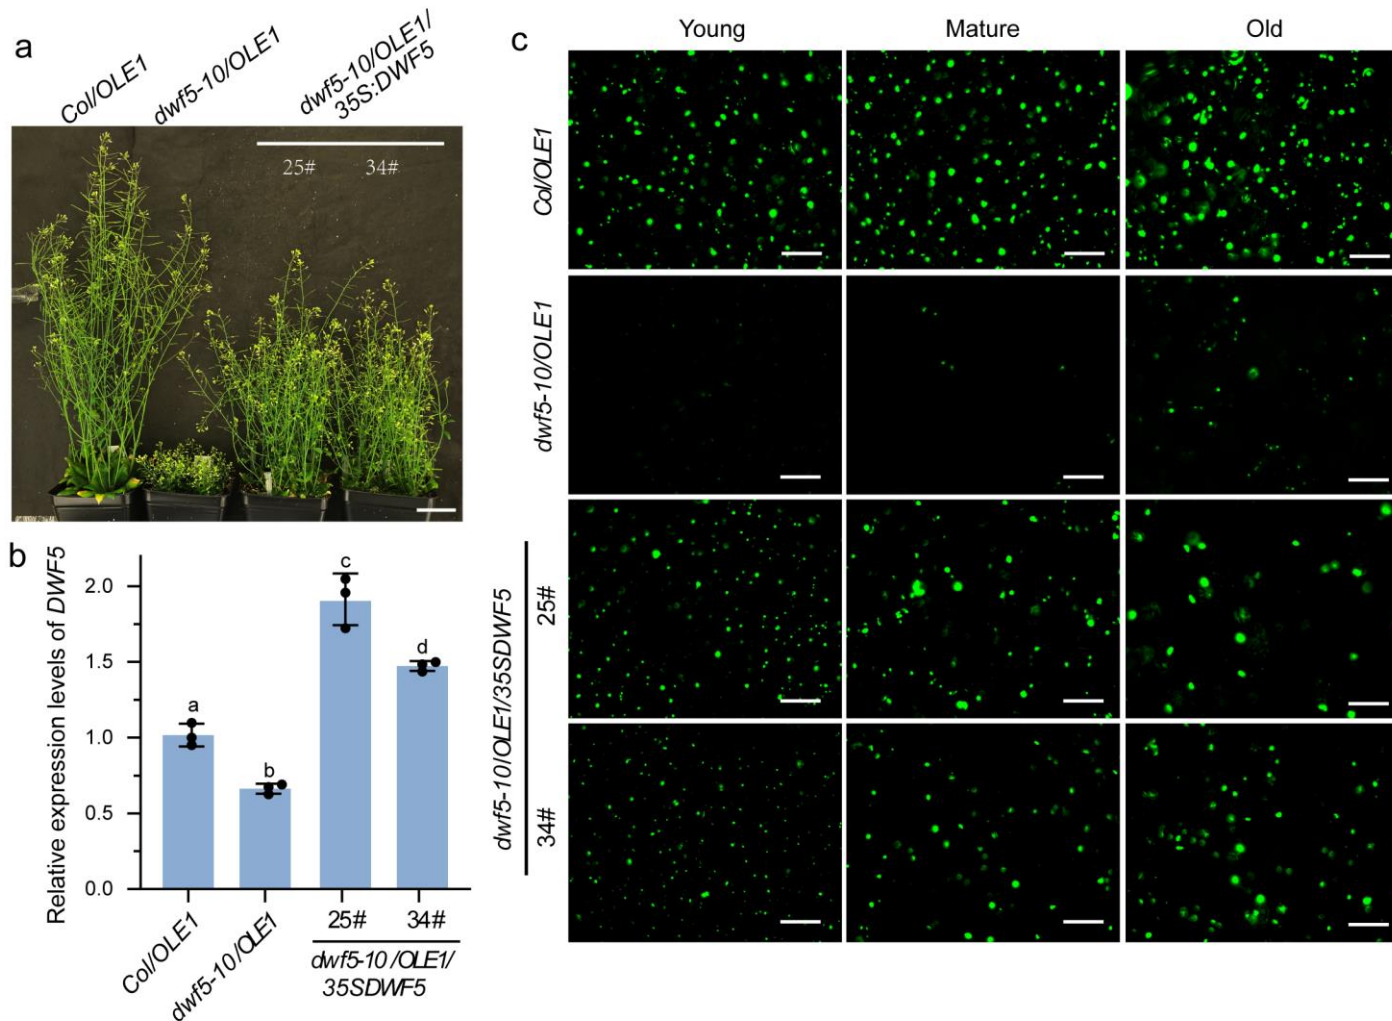

**Supplementary Fig. 3 Functional complementation analysis of *dwarf5-10*.** **a** Growth phenotypes of 6-week-old *dwarf5-10/OLE1/35S:DWF5* lines. Bar = 4 cm. **b** *DWF5* expression levels in *Col/OLE1*, *dwarf5-10/OLE1*, *dwarf5-10/OLE1/35S:DWF5* plants quantified by qRT-PCR. Data are mean  $\pm$  s.d. of three biological replicates. Different letters indicate significant differences at  $P < 0.05$ , as determined by one-way ANOVA with Tukey's multiple comparisons test. **c** Representative images of LDs (OLE1-GFP, green) in young, mature and old leaves of 4-week-old *Col/OLE1*, *dwarf5-10/OLE1*, *dwarf5-10/OLE1/35S:DWF5* plants. The experiment was repeated 3 times with similar results. Bar = 50  $\mu$ m.

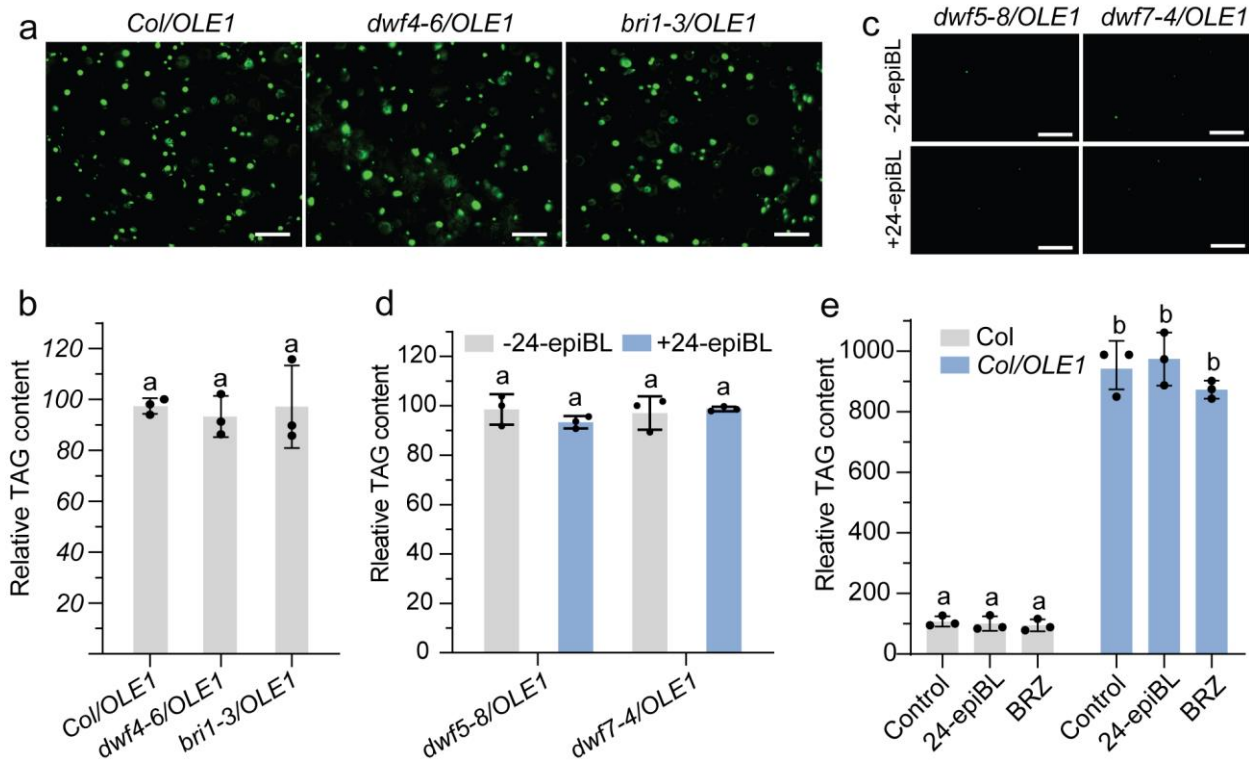

**Supplementary Fig. 4 BRs and BR signaling do not affect TAG and LD accumulation in leaves.** **a** Representative images of LDs (OLE1-GFP, green) in mature leaves of 4-week-old *Col/OLE1*, *dwf4-6/OLE1* and *bri1-3/OLE1* plants. The experiment was repeated 3 times with similar results. Bar = 50  $\mu$ m. **b** Relative TAG contents in mature leaves of 4-week-old *Col/OLE1*, *dwf4-6/OLE1* and *bri1-3/OLE1* plants. **c-d** Representative images of LDs (**c**) and TAG contents (**d**) in leaves of *dwf5-8/OLE1* and *dwf7-4/OLE1* treated with or without 1  $\mu$ M 24-epiBL. Thirteen-day-old seedlings were transferred to  $\frac{1}{2}$  MS medium with or without 1  $\mu$ M 24-epiBL and incubated for 3 days prior to microscopic and TAG analyses. Bar = 50  $\mu$ m. **e** Relative TAG contents in shoots of wide type and *Col/OLE1* plants treated with 24-epiBL and BRZ. Ten-day-old wide type and *Col/OLE1* seedlings were transferred to  $\frac{1}{2}$  MS medium with or without 1  $\mu$ M 24-epiBL or BRZ and incubated for 3 days prior to TAG analysis. Relative TAG levels were quantified by Image J. In **b**, **d**, and **e**, data are mean  $\pm$  s.d. of three biological replicates. Different letters indicate significant differences at  $P < 0.05$ , as determined by one-way ANOVA with Tukey's multiple comparisons test.

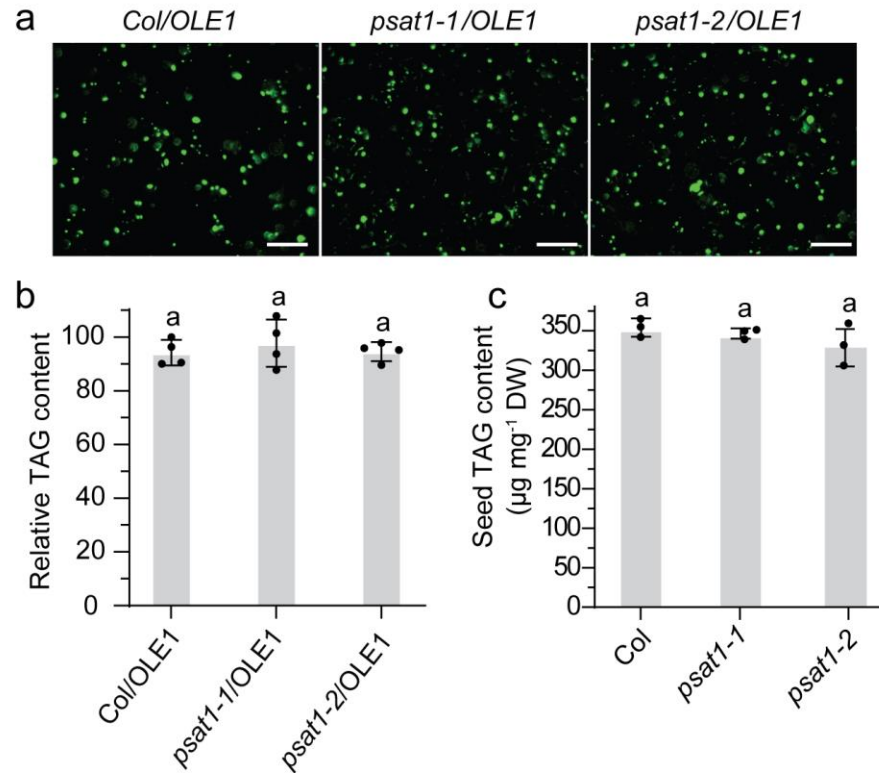

**Supplementary Fig. 5 Deficiency in SEs does not affect TAG accumulation.** **a** Representative images of LDs (OLE1-GFP, green) in mature leaves of 4-week-old *Col/OLE1*, *psat1-1/OLE1*, *psat1-2/OLE1* plants. The experiment was repeated 3 times with similar results. Bar = 50 µm. **b** TAG contents in mature leaves of *Col/OLE1*, *psat1-1/OLE1*, *psat1-2/OLE1* plants. Lipids were extracted from mature leaves of 4-week-old plants and TAGs were separated by TLC. Relative contents of TAG were quantified by Image J. Data are mean ± s.d. of four biological replicates. **c** Seed TAG contents of wild type and *psat* mutants quantified by GC-MS. Data are mean ± s.d. of three biological replicates. In **b** and **c**, different letters indicate significant differences at  $P < 0.05$ , as determined by one-way ANOVA with Tukey's multiple comparisons test.

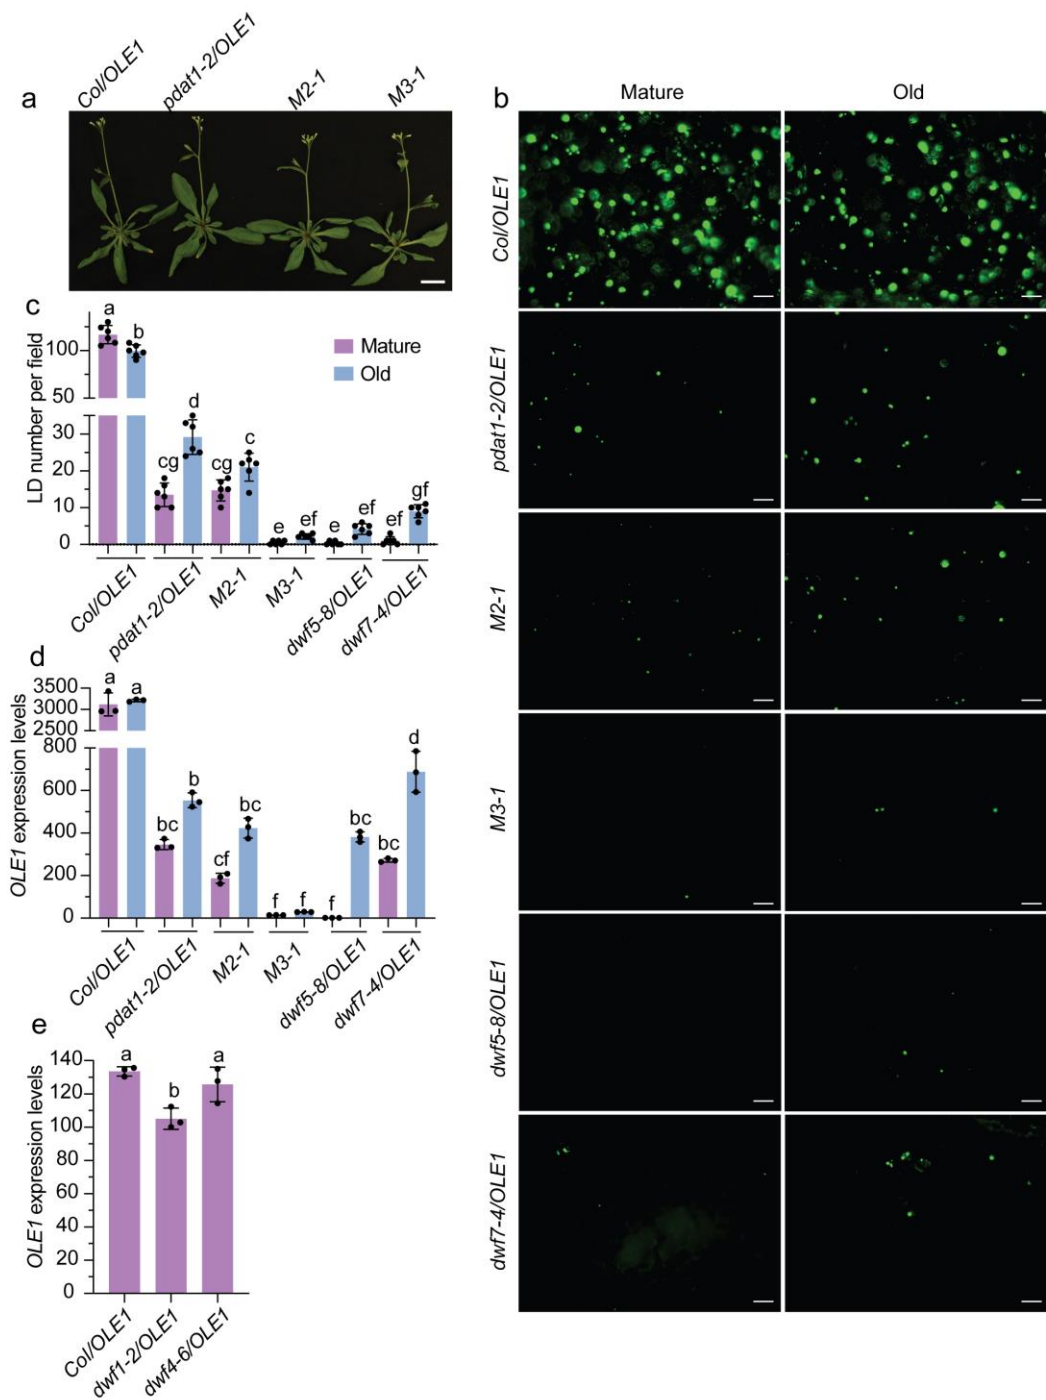

**Supplementary Fig. 6 Expression levels of *OLE1* transgene are related to LD abundance.** **a** Growth phenotype of 4-week-old wild type and LD-deficient mutants. Bar = 2 cm. **b** Representative images of LDs (*OLE1*-GFP, green) in leaves of 4-week-old *Col/OLE1* and LD-deficient mutant plants. Bar = 40  $\mu$ m. The experiment was repeated 3 times with similar results. **c** LD number per microscopic field of mature and old (for definitions, see Fig. 1) leaves. LD numbers of the leaves were counted before RNA extraction and qRT-PCR analysis. Data are mean  $\pm$  s.d. of six microscopic fields. **d** *OLE1* expression levels in mature and old leaves of 4-week-old *Col/OLE1* and LD-deficient mutant plants quantified by qRT-PCR. Data are mean  $\pm$  s.d. of three biological replicates. **e** *OLE1* expression levels in mature leaves of 4-week-old *Col/OLE1*, *dwf1-2/OLE1* and *dwf4-6/OLE1* plants quantified by qRT-PCR. Data are mean  $\pm$  s.d. of three biological replicates. In **c**, **d**, and **e**, different letters indicate significant differences at  $P < 0.05$ , as determined by one-way ANOVA with Tukey's multiple comparisons test.

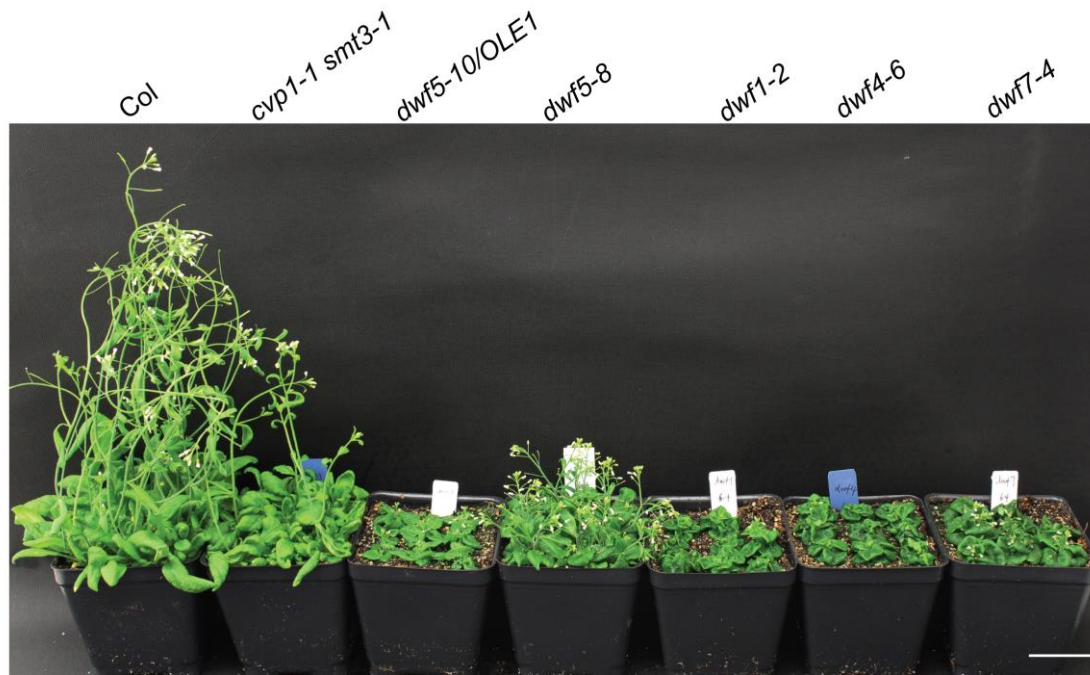

**Supplementary Fig. 7 Five-week-old plants grown on soil. Bar=4 cm.**

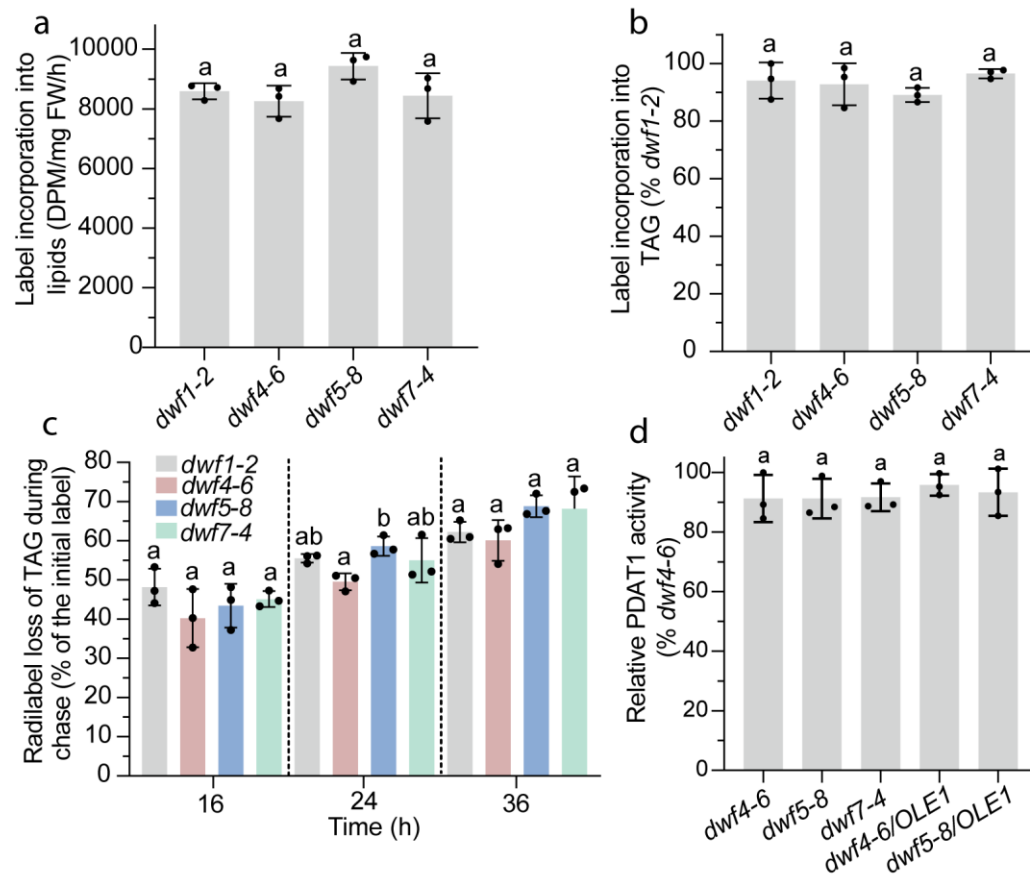

**Supplementary Fig. 8**  $^{14}\text{C}$ -acetate pulse-chase labeling assay and PDAT1 activity assay. **a** Initial rates of fatty acid synthesis in mature leaves of 4-week-old *dwf1-2*, *dwf4-6*, *dwf5-8* and *dwf7-4* measured by  $^{14}\text{C}$ -acetate labeling for 1 h. Label incorporation into total lipids was measured by scintillation counting. **b** Label incorporation into TAG in *dwf1-2*, *dwf4-6*, *dwf5-8* and *dwf7-4* leaves by  $^{14}\text{C}$ -acetate labeling for 1 h. **c** Radiolabel loss of TAG during the chase following 1 h incubation with  $^{14}\text{C}$ -acetate. **d** Relative PDAT1 activity in microsomal membranes of mature leaves of *dwf4-6*, *dwf5-8*, *dwf7-4*, *dwf4-6/OLE1* and *dwf5-8/OLE1* plants. Data are mean  $\pm$  s.d. of three biological replicates. Different letters indicate significant differences at  $P < 0.05$ , as determined by one-way ANOVA with Tukey's multiple comparisons test.



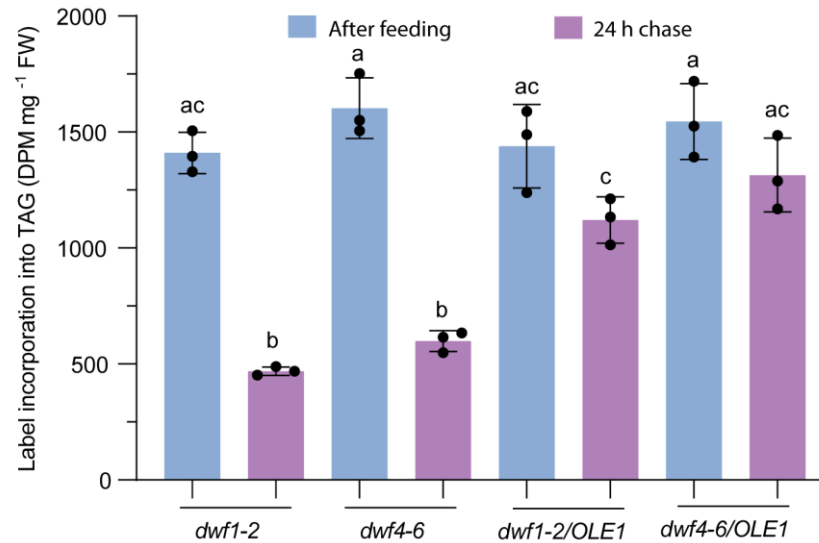

**Supplementary Fig. 9** Label incorporation into TAG in leaves of *dwf1-2*, *dwf4-6*, *dwf1-2/OLE1*, and *dwf4-6/OLE1* after <sup>14</sup>C-oleic acid feeding and after 24 h of chase. Lipids were extracted from leaves and separated by TLC. Radiolabeled TAGs were quantified by liquid scintillation counting. Data are mean ± s.d. of three biological replicates. Different letters indicate significant differences at  $P < 0.05$ , as determined by one-way ANOVA with Tukey's multiple comparisons test.

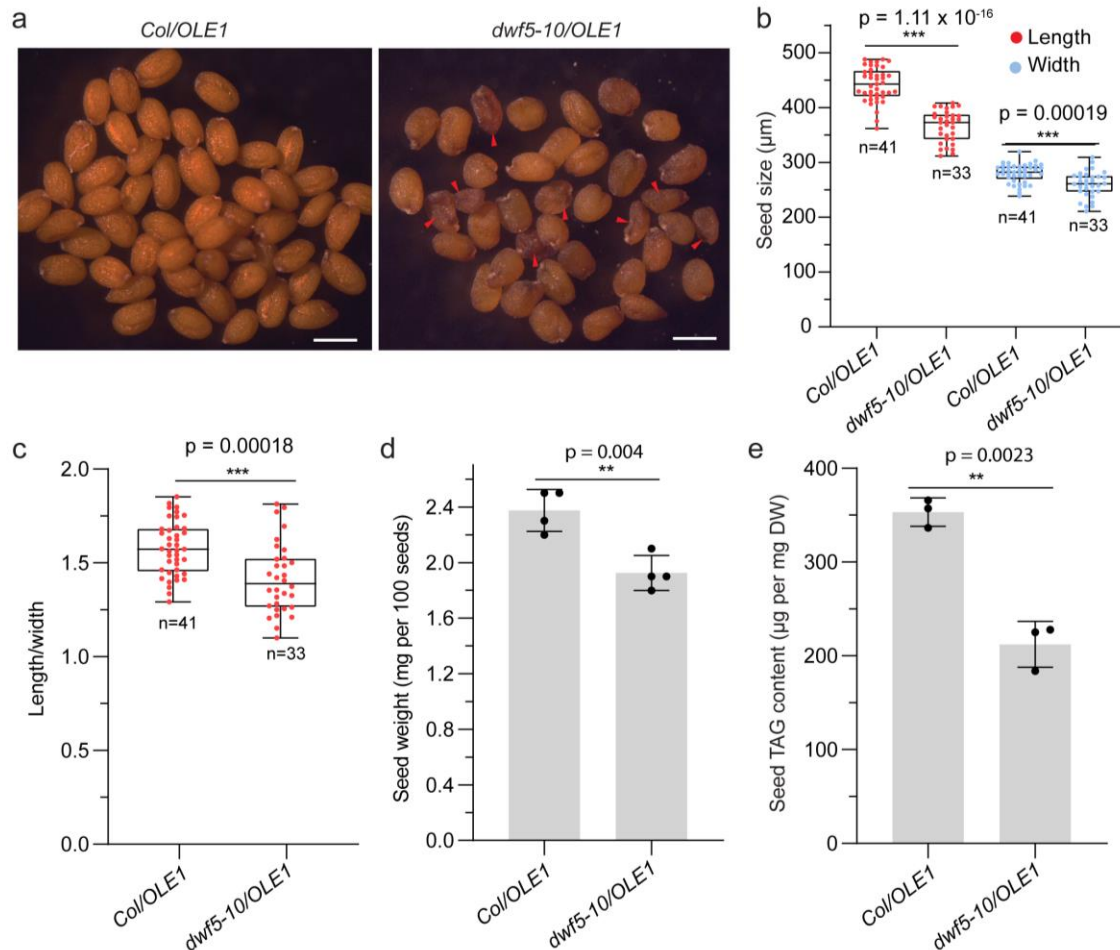

**Supplementary Fig. 10 Seed morphology and TAG content altered in *dwf5-10/OLE1*.** **a** Representative phenotype of dry seeds of *Col/OLE1* and *dwf5-10/OLE1*. Red triangles indicate severe wrinkled seeds. Bar = 400  $\mu\text{m}$ . **b** Seed size. **c** Length to width ratio of seeds. **d** Weight per 100 seeds. Data are mean  $\pm$  s.d. of four biological replicates. **e** Seed TAG contents. Data are mean  $\pm$  s.d. of three biological replicates. In **b** and **c**, n represents the number of seed used for data collection. The box plot boundaries reflect the interquartile range, the centre line is the median and the whiskers represent 1.5 $\times$  the interquartile range from the lower and upper quartiles. In **b**, **c**, **d**, and **e**, asterisks indicate statistically significant differences based on a two-sided Student's *t* test (\* $P < 0.05$ , \*\* $P < 0.01$ , \*\*\* $P < 0.001$ ).

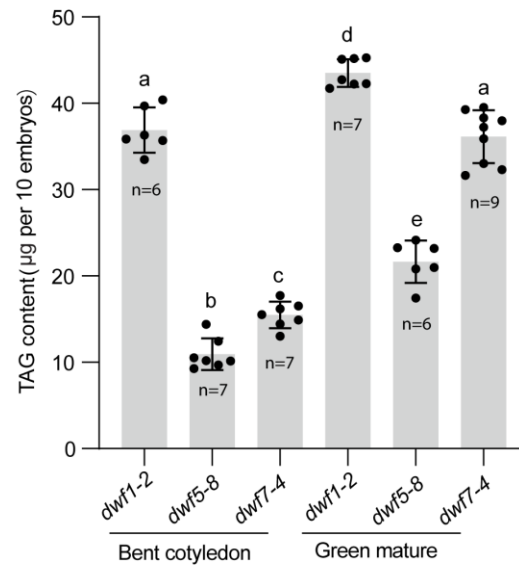

**Supplementary Fig. 11 TAG contents in *dwf1-2*, *dwf5-8*, *dwf7-4* embryos at bent cotyledon and green mature stage.** Embryos were dissected under dissecting microscope, and 10 embryos at bent cotyledon or mature green stage were used for TAG analysis by GC-MS. n represents the number of biological replicates. Data are mean  $\pm$  s.d.. Different letters indicate significant differences at  $P < 0.05$ , as determined by one-way ANOVA with Tukey's multiple comparisons test.

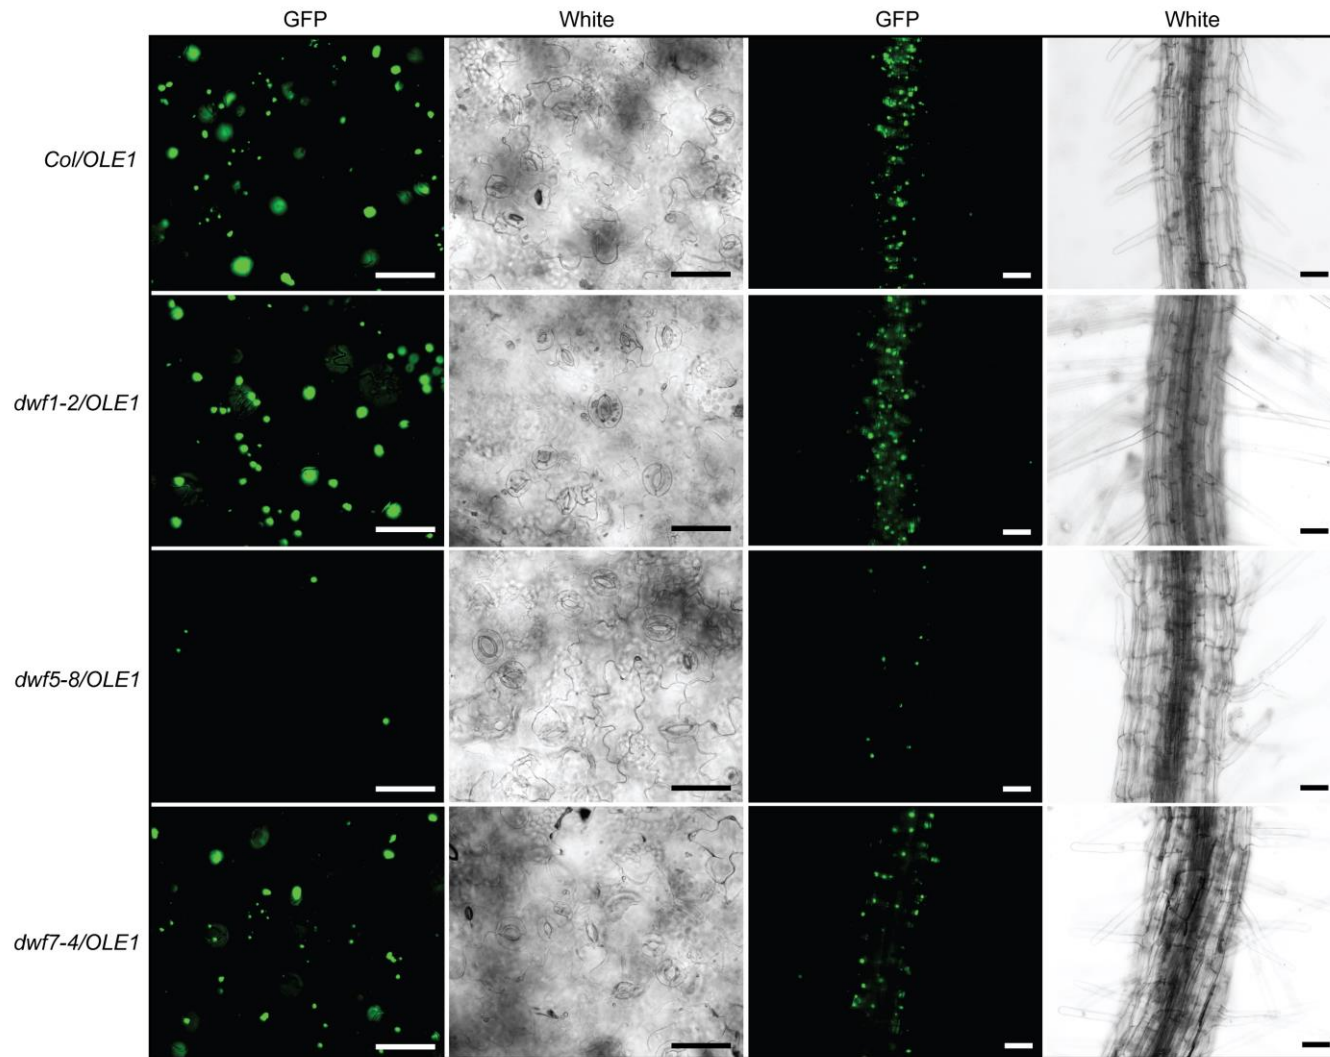

**Supplementary Fig. 12 LDs in root and cotyledon of young seedlings.** LDs (OLE1-GFP, green) in root and cotyledon of 6-day-old seedlings were visualized under a Zeiss epifluorescence microscope. The experiment was repeated 3 times with similar results. Bar = 50  $\mu$ m.

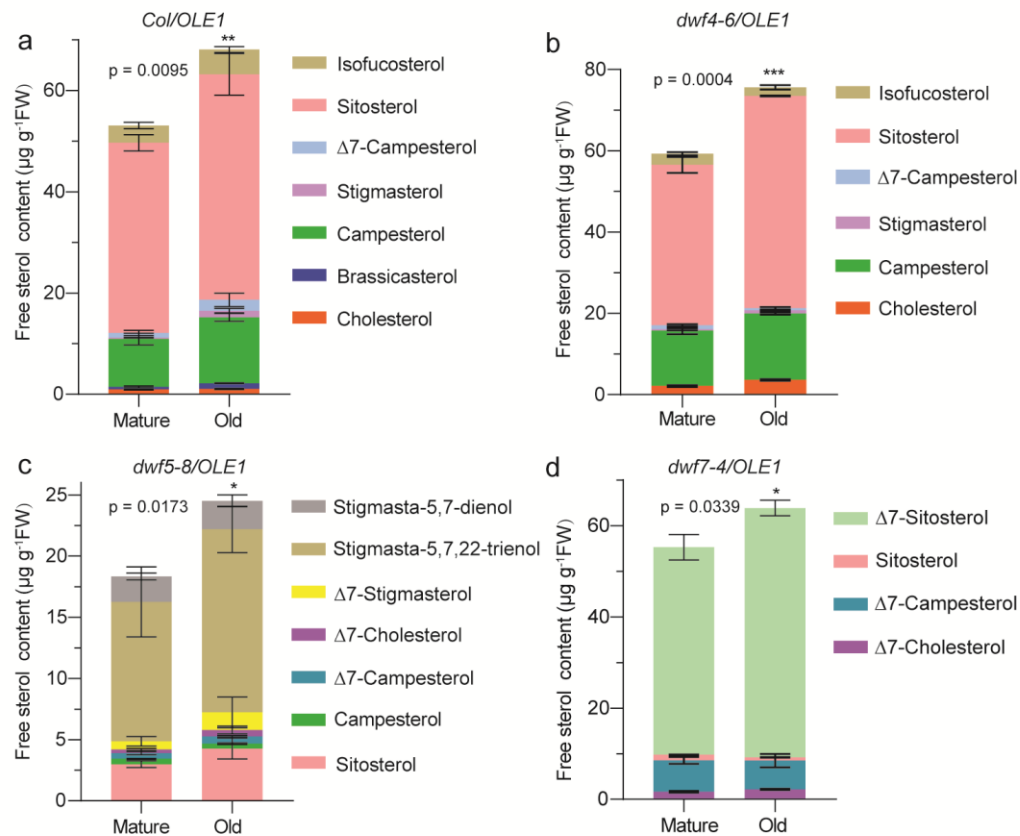

**Supplementary Fig. 13 Free sterol levels in mature and old leaves.** Free sterol contents of mature and old leaves of 4-week-old *Col/OLE1*, *dwf4-6/OLE1*, *dwf5-8/OLE1* and *dwf7-4/OLE1* plants were measured by GC-MS. Data are mean  $\pm$  s.d. of three biological replicates. Asterisks indicate significant differences, as determined by a two-sided Student's *t* test (\* $P < 0.05$ , \*\* $P < 0.01$ , \*\*\* $P < 0.001$ ).

**Supplementary Table 1 Sterol composition in mature leaves of 4-week-old wild type, *dwf* and *psat* mutants.**  
 Values are given in  $\mu\text{g}$  per g fresh weight. Data are mean  $\pm$  s.d. of three biological replicates.

| Sterols                  | Genotype         |                  |                  |                  |                  |                      |                  |                  |                  |                     |
|--------------------------|------------------|------------------|------------------|------------------|------------------|----------------------|------------------|------------------|------------------|---------------------|
|                          | Col              | <i>dwf1-2</i>    | <i>dwf4-6</i>    | <i>dwf5-8</i>    | <i>dwf7-4</i>    | <i>cvp1-3 smt3-1</i> | <i>psat1-1</i>   | <i>psat1-2</i>   | <i>Col/OLE1</i>  | <i>dwf5-10/OLE1</i> |
| Cholesterol              | 0.93 $\pm$ 0.27  |                  | 1.15 $\pm$ 0.12  | 0.24 $\pm$ 0.07  |                  | 0.96 $\pm$ 0.34      | 0.62 $\pm$ 0.12  | 1.25 $\pm$ 0.22  | 1.02 $\pm$ 0.03  | 0.45 $\pm$ 0.22     |
| Brassicasterol           | 0.63 $\pm$ 0.20  |                  |                  |                  |                  | 1.19 $\pm$ 0.37      |                  | 0.68 $\pm$ 0.11  | 0.71 $\pm$ 0.54  |                     |
| $\Delta$ 7-Cholesterol   |                  |                  |                  |                  |                  |                      |                  |                  |                  | 0.80 $\pm$ 0.12     |
| 24-Methylenecholesterol  |                  | 7.49 $\pm$ 0.66  |                  |                  |                  | 8.84 $\pm$ 0.67      |                  |                  | 1.82 $\pm$ 1.31  |                     |
| Campesterol              | 6.89 $\pm$ 0.84  |                  | 8.97 $\pm$ 0.96  | 0.57 $\pm$ 0.16  | 0.12 $\pm$ 0.10  | 33.00 $\pm$ 10.33    | 6.92 $\pm$ 0.27  | 10.18 $\pm$ 2.58 | 8.96 $\pm$ 1.17  | 0.57 $\pm$ 0.21     |
| Stigmasterol             | 0.32 $\pm$ 0.05  | 0.17 $\pm$ 0.07  | 0.26 $\pm$ 0.10  |                  |                  | 0.92 $\pm$ 0.45      | 0.67 $\pm$ 0.19  | 0.39 $\pm$ 0.08  | 0.86 $\pm$ 0.19  |                     |
| $\Delta$ 7-Campesterol   | 5.36 $\pm$ 0.92  |                  | 5.89 $\pm$ 0.76  | 0.70 $\pm$ 0.29  | 1.94 $\pm$ 0.01  | 1.83 $\pm$ 1.44      | 12.87 $\pm$ 1.43 | 8.88 $\pm$ 0.67  | 10.20 $\pm$ 0.88 | 0.65 $\pm$ 0.09     |
| Sitosterol               | 29.45 $\pm$ 2.37 | 1.20 $\pm$ 0.11  | 27.20 $\pm$ 3.14 | 2.22 $\pm$ 1.02  | 0.30 $\pm$ 0.02  | 10.94 $\pm$ 3.48     | 27.10 $\pm$ 3.44 | 40.72 $\pm$ 6.85 | 32.34 $\pm$ 3.82 |                     |
| $\Delta$ 7-Stigmasterol  |                  |                  |                  | 1.48 $\pm$ 1.24  |                  |                      |                  |                  |                  | 1.43 $\pm$ 0.22     |
| Isofucosterol            | 2.56 $\pm$ 0.25  | 44.93 $\pm$ 3.48 | 2.54 $\pm$ 0.61  |                  |                  | 2.70 $\pm$ 0.73      | 2.25 $\pm$ 0.40  | 4.74 $\pm$ 1.15  | 4.80 $\pm$ 0.49  | 0.78 $\pm$ 0.10     |
| Stigmasta-5,7,22-trienol |                  |                  |                  | 6.23 $\pm$ 0.77  |                  |                      |                  |                  |                  | 8.19 $\pm$ 1.60     |
| Stigmasta-5,7-dienol     |                  |                  |                  | 1.26 $\pm$ 0.48  |                  |                      |                  |                  |                  | 3.07 $\pm$ 0.22     |
| $\Delta$ 7-Sitosterol    |                  |                  |                  |                  | 34.92 $\pm$ 1.43 |                      |                  |                  |                  |                     |
| Total                    | 46.14 $\pm$ 3.30 | 53.34 $\pm$ 3.94 | 45.99 $\pm$ 5.59 | 12.70 $\pm$ 3.16 | 37.24 $\pm$ 1.36 | 55.71 $\pm$ 8.35     | 49.3 $\pm$ 3.64  | 66.84 $\pm$ 9.15 | 60.70 $\pm$ 5.56 | 15.66 $\pm$ 0.90    |

**Supplementary Table 2 Sterol-ester composition in mature leaves of 4-week-old wild type, *dwf* and *psat* mutants.** Values are given in  $\mu\text{g}$  per g fresh weight. Data are mean  $\pm$  s.d. of three biological replicates.

| Sterols                       | Genotype         |                  |                  |                 |                 |                      |                 |                 |                  |                     |
|-------------------------------|------------------|------------------|------------------|-----------------|-----------------|----------------------|-----------------|-----------------|------------------|---------------------|
|                               | <i>col</i>       | <i>dwf1-2</i>    | <i>dwf4-6</i>    | <i>dwf5-8</i>   | <i>dwf7-4</i>   | <i>cvp1-3 smt3-1</i> | <i>psat1-1</i>  | <i>psat1-2</i>  | <i>Col/OLE1</i>  | <i>dwf5-10/OLE1</i> |
| Cholesterol                   | 0.32 $\pm$ 0.11  |                  | 0.33 $\pm$ 0.06  |                 |                 |                      | 0.27 $\pm$ 0.07 | 0.10 $\pm$ 0.09 | 0.39 $\pm$ 0.06  |                     |
| Brassicasterol                |                  |                  |                  |                 |                 |                      |                 |                 | 0.71 $\pm$ 0.54  |                     |
| 24-Methylenecholesterol       |                  | 2.12 $\pm$ 0.14  |                  |                 |                 |                      |                 |                 |                  |                     |
| Campesterol                   | 3.93 $\pm$ 0.61  |                  | 2.73 $\pm$ 0.15  |                 | 0.13 $\pm$ 0.09 | 0.73 $\pm$ 0.39      | 2.01 $\pm$ 0.53 | 0.53 $\pm$ 0.07 | 2.35 $\pm$ 1.87  | 1.48 $\pm$ 0.34     |
| Stigmasterol                  | 0.28 $\pm$ 0.10  |                  |                  |                 |                 |                      |                 |                 |                  |                     |
| $\Delta$ 7-Campesterol        | 0.92 $\pm$ 0.30  |                  | 0.48 $\pm$ 0.21  |                 | 0.14 $\pm$ 0.02 |                      | 0.43 $\pm$ 0.07 |                 | 0.66 $\pm$ 0.16  |                     |
| $\Delta$ 5,22,25-Stigmasterol |                  | 0.79 $\pm$ 0.18  |                  |                 |                 |                      |                 |                 |                  |                     |
| Sitosterol                    | 15.48 $\pm$ 4.02 | 0.34 $\pm$ 0.08  | 7.70 $\pm$ 0.76  | 0.57 $\pm$ 0.17 |                 | 0.57 $\pm$ 0.12      | 2.18 $\pm$ 0.45 | 0.68 $\pm$ 0.19 | 15.93 $\pm$ 2.22 | 0.57 $\pm$ 0.04     |
| $\Delta$ 7-Stigmasterol       |                  |                  |                  | 0.61 $\pm$ 0.23 |                 | 0.39 $\pm$ 0.03      |                 |                 |                  |                     |
| Isofucosterol                 | 3.44 $\pm$ 1.45  | 9.07 $\pm$ 0.61  | 1.01 $\pm$ 0.12  |                 |                 |                      | 0.17 $\pm$ 0.02 | 0.13 $\pm$ 0.12 | 4.90 $\pm$ 3.08  |                     |
| Stigmasta-5,7,22-trienol      |                  |                  |                  | 2.29 $\pm$ 0.82 |                 | 2.27 $\pm$ 0.52      |                 |                 |                  | 1.98 $\pm$ 0.14     |
| Stigmasta-5,7-dienol          |                  |                  |                  | 0.64 $\pm$ 0.41 |                 | 1.02 $\pm$ 0.29      |                 |                 |                  | 0.65 $\pm$ 0.22     |
| $\Delta$ 7-Sitosterol         |                  |                  |                  |                 | 2.18 $\pm$ 0.08 |                      |                 |                 |                  |                     |
| Total                         | 23.76 $\pm$ 6.76 | 12.33 $\pm$ 0.53 | 12.24 $\pm$ 0.95 | 4.12 $\pm$ 1.13 | 2.46 $\pm$ 0.02 | 4.98 $\pm$ 1.33      | 5.05 $\pm$ 1.10 | 1.44 $\pm$ 0.33 | 23.85 $\pm$ 5.20 | 4.96 $\pm$ 0.56     |

**Supplementary Table 3 Sterol composition in dry seeds of wild type, *dwf* and *psat* mutants.**  
 Values are given in  $\mu\text{g}$  per g dry weight. Data are mean  $\pm$  s.d. of three biological replicates.

| Sterols                       | Genotype           |                    |                    |                    |                    |                      |                    |                    |                     |
|-------------------------------|--------------------|--------------------|--------------------|--------------------|--------------------|----------------------|--------------------|--------------------|---------------------|
|                               | Col                | <i>dwf1-2</i>      | <i>dwf4-6</i>      | <i>dwf5-8</i>      | <i>dwf7-4</i>      | <i>cvp1-3 smt3-1</i> | <i>psat1-1</i>     | <i>Col/OLE1</i>    | <i>dwf5-10/OLE1</i> |
| Cholesterol                   | 5.54 $\pm$ 0.64    |                    | 3.35 $\pm$ 0.51    |                    |                    | 12.79 $\pm$ 3.49     | 4.46 $\pm$ 0.62    | 8.39 $\pm$ 6.89    | 5.72 $\pm$ 1.74     |
| Brassicasterol                | 10.15 $\pm$ 1.61   |                    |                    |                    |                    | 12.81 $\pm$ 0.08     | 5.66 $\pm$ 0.30    | 6.52 $\pm$ 1.63    |                     |
| 24-methylenecholesterol       |                    | 27.50 $\pm$ 3.68   |                    |                    |                    | 130.91 $\pm$ 26.57   | 31.33 $\pm$ 8.19   | 17.93 $\pm$ 4.81   |                     |
| Campesterol                   | 50.72 $\pm$ 15.56  |                    | 66.01 $\pm$ 19.56  | 8.62 $\pm$ 2.59    | 20.64 $\pm$ 2.43   | 330.60 $\pm$ 88.50   | 71.80 $\pm$ 16.95  | 52.64 $\pm$ 3.03   | 5.83 $\pm$ 0.44     |
| Stigmasterol                  | 27.52 $\pm$ 8.77   |                    | 8.97 $\pm$ 2.37    |                    |                    |                      | 10.53 $\pm$ 7.92   | 4.33 $\pm$ 3.45    |                     |
| $\Delta$ 7-Campesterol        | 62.44 $\pm$ 14.87  | 7.68 $\pm$ 1.95    | 76.55 $\pm$ 3.35   | 15.25 $\pm$ 6.61   | 41.60 $\pm$ 7.73   |                      | 144.54 $\pm$ 19.72 | 95.53 $\pm$ 19.46  | 13.61 $\pm$ 3.82    |
| $\Delta$ 5,22,25-Stigmasterol |                    | 101.52 $\pm$ 29.85 |                    |                    |                    |                      |                    |                    |                     |
| Sitosterol                    | 400.60 $\pm$ 53.96 | 29.04 $\pm$ 8.77   | 327.37 $\pm$ 47.94 | 17.26 $\pm$ 1.90   | 41.74 $\pm$ 8.70   | 6.90 $\pm$ 1.57      | 380.75 $\pm$ 65.90 | 287.91 $\pm$ 25.74 | 17.70 $\pm$ 5.80    |
| $\Delta$ 7-Stigmasterol       |                    |                    |                    | 59.62 $\pm$ 7.63   |                    |                      |                    |                    | 45.67 $\pm$ 7.22    |
| Isocuposterol                 | 33.74 $\pm$ 12.45  | 328.01 $\pm$ 85.82 | 27.85 $\pm$ 5.18   |                    |                    |                      | 11.29 $\pm$ 6.81   | 20.27 $\pm$ 4.07   |                     |
| Stigmasta-5,7,22-trienol      |                    |                    |                    | 36.58 $\pm$ 8.09   |                    |                      |                    |                    | 18.32 $\pm$ 3.28    |
| Stigmasta-5,7-dienol          |                    |                    |                    | 27.29 $\pm$ 4.29   |                    |                      |                    |                    | 19.75 $\pm$ 3.69    |
| $\Delta$ 7-Sitosterol         |                    |                    |                    |                    | 153.30 $\pm$ 24.83 |                      |                    |                    |                     |
| Total                         | 590.70 $\pm$ 62.47 | 493.75 $\pm$ 91.82 | 510.09 $\pm$ 65.95 | 164.61 $\pm$ 19.74 | 257.29 $\pm$ 21.11 | 497.74 $\pm$ 79.02   | 661.08 $\pm$ 83.55 | 493.22 $\pm$ 30.91 | 124.70 $\pm$ 21.22  |



**Supplementary Table 4 Primers used in this study.**

| Primers used for mapping |                    |                         |                     |     |                           |                          |
|--------------------------|--------------------|-------------------------|---------------------|-----|---------------------------|--------------------------|
| Marker name              | Location in genome | Type                    | Size of PCR product |     | Forward primer sequences  | Reverse primer sequences |
|                          |                    |                         | Col                 | Ler |                           |                          |
| 1-5886                   | 17911k             | sslp                    | 141                 | 124 | TCCGATCTTCACTATTATTT      | ACCTAATATCGGATCAATTC     |
| 1-6115                   | 18605k             | sslp                    | 144                 | 126 | CCACTAGACAAGTACAAGAT      | CACAAGAAAACCCTGTATTA     |
| 1-6395                   | 19459k             | sslp                    | 173                 | 148 | GTCCTTGAAACTACATTTGTTTCAT | GTTCCAATGATAGTGAATTGTGAG |
| 1-6556                   | 19947k             | sslp                    | 126                 | 96  | TAAAGATACGATTTCGTAAGA     | CTAGCAGGCAAATGAGAC       |
| nga280                   | 20873k             | sslp                    | 105                 | 85  | CTGATCTCACGGACAATAGTGC    | GGCTCCATAAAAAGTGCACC     |
| 1-7199                   | 21906k             | sslp                    | 152                 | 207 | AGATGCAAATTCCAAGAAAC      | GCCAGACATACTTTCATGTG     |
| Primers used for qRT-PCR |                    |                         |                     |     |                           |                          |
| <i>DWF5</i> qRT-PCR FP   |                    | ACATTGCACATGACCGAGCTG   |                     |     |                           |                          |
| <i>DWF5</i> qRT-PCR RP   |                    | AAGGCACCCACACTAGACAACC  |                     |     |                           |                          |
| <i>UBQ5</i> qRT-PCR FP   |                    | AGAAGATCAAGCACAAGCAT    |                     |     |                           |                          |
| <i>UBQ5</i> qRT-PCR RP   |                    | CAGATCAAGCTTCAACTCCT    |                     |     |                           |                          |
| <i>OLE1</i> qRT-PCR FP   |                    | AGGCAGATTGCTAAAGCTGCAAC |                     |     |                           |                          |
| <i>OLE1</i> qRT-PCR RP   |                    | ACTGTGATGAGAGCCGGG      |                     |     |                           |                          |
