# Supplementary material for: Sterols are required for the coordinated assembly of lipid droplets in developing seeds
Source: PubMed Central journal article supplement (PMC8458542; doi:10.1038/s41467-021-25908-6), 2021-09-22
Supplement: 41467_2021_25908_MOESM3_ESM.pdf [file 41467_2021_25908_MOESM3_ESM.pdf]

## Description of Additional Supplementary Files

**Supplementary Data 1:** Mutations identified in the region between the marker 1-5886 and nga280 by Mutmap sequencing
